# Supplementary material
Source: publisher figshare collection journal article supplement (https://gsajournals.figshare.com/ndownloader/files/15023054)
Supplement: Supplementary file 1 [file 15023054]

## Sheet: Sheet1
Table S2 dbGaP studies selected to evaluate GRAF-pop and other ancestry-inference software packages
phs	version	Study accession	Study name	#subjects	Platforms	Study url	Population url	Study-reported populations	Fingerprint SNPs covered
50	1	phs000050.v1.p1	Genotyping the 270 HapMap samples for GAIN by Perlegen	270	PERLEGEN-600K	https://www.ncbi.nlm.nih.gov/ projects/gap/cgi-bin/study.cgi? study_id=phs000050.v1.p1	https://www.ncbi.nlm.nih.gov/ projects/gap/population/cgi-bin/ StudySubjectAncestry.cgi?phs=50&version=1	CEPH; YOR; CHB; JPT	8118
403	3	phs000403.v3.p3	NHLBI GO-ESP: Heart Cohorts Exome Sequencing Project (MESA)	404	Genome Analyzer IIX; HiSeq 2000	https://www.ncbi.nlm.nih.gov/ projects/gap/cgi-bin/study.cgi? study_id=phs000403.v3.p3	https://www.ncbi.nlm.nih.gov/ projects/gap/population/cgi-bin/ StudySubjectAncestry.cgi?phs=403&version=3	African American; European American	576
420	6	phs000420.v6.p3	NHLBI MESA SHARe	8224	AFFY_6.0; Infinium HumanExome BeadChip	https://www.ncbi.nlm.nih.gov/ projects/gap/cgi-bin/study.cgi? study_id=phs000420.v6.p3	https://www.ncbi.nlm.nih.gov/ projects/gap/population/cgi-bin/ StudySubjectAncestry.cgi?phs=420&version=6	African American; Black; Back, African-American; White, Caucasian; European American; Hispanic; Chinese American	9450
456	1	phs000456.v1.p1	Risk Assessment of Cerebrovascular Events (RACE) Study	2493	Human660W-Quad_v1_A	https://www.ncbi.nlm.nih.gov/ projects/gap/cgi-bin/study.cgi? study_id=phs000456.v1.p1	https://www.ncbi.nlm.nih.gov/ projects/gap/population/cgi-bin/ StudySubjectAncestry.cgi?phs=456&version=1	Pakistani	9973
517	3	phs000517.v3.p1	Multiethnic Cohort (MEC) Breast Cancer Genetics	3708	Human660W-Quad_v1_A; ILLUMINA_Human_1M	https://www.ncbi.nlm.nih.gov/ projects/gap/cgi-bin/study.cgi? study_id=phs000517.v3.p1	https://www.ncbi.nlm.nih.gov/ projects/gap/population/cgi-bin/ StudySubjectAncestry.cgi?phs=517&version=3	Black or African American; Latino; Japanese	9964
